# Supplementary material for: Association of the SH2B1 rs7359397 Gene Polymorphism with Steatosis Severity in Subjects with Obesity and Non-Alcoholic Fatty Liver Disease
Source: PubMed Central journal article supplement (PMC7282006; doi:10.3390/nu12051260), 2020-04-29
Supplement: nutrients-12-01260-s001.pdf [file nutrients-12-01260-s001.pdf]

**Table S1.** Logistic regression analysis between Fatty Liver Index and genotype in NAFLD subjects.

|                        | OR (95% CI)                        | p-value                  |
|------------------------|------------------------------------|--------------------------|
| <b>rs7359397 SH2B1</b> |                                    |                          |
| CC (No risk genotype)  | Reference                          |                          |
| CT/TT (Risk genotype)  | 2.91 (1.07;7.91)                   | 0.036                    |
| Sex                    | 0.22 (0.07;0.64)                   | 0.006                    |
| Age                    | 0.94 (0.89;1.00)                   | 0.060                    |
| ALT                    | 3.72 (1.29;10.7)                   | 0.015                    |
| Physical activity      | 0.88 (0.55;1.40)                   | 0.602                    |
| Total energy intake    | 1.00 (0.99;1.00)                   | 0.186                    |
|                        | <b>Pseudo R<sup>2</sup> 0.2472</b> | <b>p-model &lt;0.001</b> |

p<0.05 was considered statistically significance. Odds Ratio (95% confidence interval) for hepatic steatosis were compared by logistic regression. ALT, Alanine aminotransferase. FLI was categorized according to the median (<80 vs. ≥80).

**Table S2.** Logistic regression analysis showing the association between steatosis degree measured by ultrasonography and genotype risk in NAFLD subjects.

|                        | OR (95% CI)                        | p-value                  |
|------------------------|------------------------------------|--------------------------|
| <b>rs7359397 SH2B1</b> |                                    |                          |
| CC (No risk genotype)  | Reference                          |                          |
| CT/TT (Risk genotype)  | 4.15 (1.59;10.8)                   | 0.004                    |
| Sex                    | 0.97 (0.34;2.76)                   | 0.956                    |
| Age                    | 1.03 (0.98;1.09)                   | 0.183                    |
| BMI                    | 1.16 (1.01;1.32)                   | 0.027                    |
| ALT                    | 7.01 (2.03;21.37)                  | <0.001                   |
| Physical activity      | 0.88 (0.57;1.36)                   | 0.567                    |
| Adherence to MedDiet   | 0.99 (0.78;1.25)                   | 0.935                    |
|                        | <b>Pseudo R<sup>2</sup> 0.2434</b> | <b>p-model &lt;0.001</b> |

p<0.05 was considered statistically significance. Odds Ratio (95% confidence interval) for hepatic steatosis were compared by logistic regression. ALT, Alanine aminotransferase; BMI, Body Mass Index.

**Table S3.** Multinomial logistic regression model with *SH2B1* genotype as independent variable and Liver fat content assessed by Magnetic Resonance Imaging (MRI) as dependent variable.

|                              | <b>RRR (95% CI)</b>                | <b>p-value</b>           |
|------------------------------|------------------------------------|--------------------------|
| <b>MRI Liver fat content</b> |                                    |                          |
| <b>T1 (0.2 – 4.5%)</b>       | Reference                          |                          |
| <b>T2 (4.6 – 8.9%)</b>       |                                    |                          |
| CC (No-risk genotype)        | Reference                          |                          |
| CT/TT (Risk genotype)        | 1.68 (0.58;4.88)                   | 0.337                    |
| Sex                          | 0.42 (0.11;1.58)                   | 0.202                    |
| Age                          | 0.98 (0.92;1.02)                   | 0.649                    |
| BMI                          | 1.03 (0.89;1.20)                   | 0.635                    |
| ALT                          | 1.64 (0.40;6.72)                   | 0.490                    |
| Physical activity            | 0.52 (0.30; 0.90)                  | 0.021                    |
| Adherence to MedDiet         | 1.10 (0.84;1.42)                   | 0.470                    |
| <b>T3 (9.3 – 62.5%)</b>      |                                    |                          |
| CC (No-risk genotype)        | Reference                          |                          |
| CT/TT (Risk genotype)        | 3.93 (1.09;14.10)                  | 0.036                    |
| Sex                          | 1.04 (0.27;4.02)                   | 0.948                    |
| Age                          | 1.03 (0.96;1.10)                   | 0.308                    |
| BMI                          | 1.08 (0.93;1.27)                   | 0.284                    |
| ALT                          | 36.6 (7.03;191.22)                 | <0.001                   |
| Physical activity            | 0.76 (0.43;1.33)                   | 0.346                    |
| Adherence to MedDiet         | 0.84 (0.60;1.17)                   | 0.309                    |
|                              | <b>Pseudo R<sup>2</sup> 0.2321</b> | <b>p-model &lt;0.001</b> |

Relative Risk Ratio (95% confidence interval) for Liver fat content assessed by Magnetic Resonance Imaging (MRI) were compared by multinomial logistic regression.  $p < 0.05$  was considered statistically significance. ALT, Alanine aminotransferase; BMI, Body Mass Index; MRI, Magnetic Resonance Imaging.

**Table S4.** Multinomial logistic regression model with *SH2B1* genetic variant as an independent variable and the diagnostic of steatosis or steatohepatitis (by lipidomic analysis) as dependent variable.

|                          | <b>RRR (95% CI)</b>                | <b>p-value</b>           |
|--------------------------|------------------------------------|--------------------------|
| <b>OWLiver®-Test</b>     |                                    |                          |
| No NAFLD or inconclusive | Reference                          |                          |
| Hepatic steatosis        |                                    |                          |
| CC (No-risk genotype)    | Reference                          |                          |
| CT/TT (Risk genotype)    | 4.77 (1.13;20.09)                  | 0.033                    |
| Sex                      | 3.20 (0.70;14.64)                  | 0.132                    |
| Age                      | 1.08 (1.00;1.18)                   | 0.047                    |
| ALT                      | 2.61 (0.62;10.98)                  | 0.191                    |
| Physical activity        | 0.64 (0.35;1.14)                   | 0.131                    |
| Adherence to MedDiet     | 0.83 (0.59; 1.18)                  | 0.313                    |
| NASH                     |                                    |                          |
| CC (No-risk genotype)    | Reference                          |                          |
| CT/TT (Risk genotype)    | 7.88 (2.08;29.75)                  | 0.002                    |
| Sex                      | 2.76 (0.65;11.6)                   | 0.164                    |
| Age                      | 1.04 (0.96;1.12)                   | 0.282                    |
| ALT                      | 2.55 (0.68;9.55)                   | 0.165                    |
| Physical activity        | 0.53 (0.31; 0.90)                  | 0.020                    |
| Adherence to MedDiet     | 1.05 (0.78; 1.43)                  | 0.712                    |
|                          | <b>Pseudo R<sup>2</sup> 0.1211</b> | <b>p-model &lt;0.013</b> |

Relative Risk Ratio (95% confidence interval) for the diagnostic of steatosis or steatohepatitis (by lipidomic analysis) by multinomial logistic regression.  $p < 0.05$  was considered statistically significance. ALT, Alanine aminotransferase; NAFLD: Non-alcoholic Fatty Liver Disease; NASH, Non-alcoholic steatohepatitis.
